# Supplementary material for: A combined stretching–tilting mechanism produces negative, zero and positive linear thermal expansion in a semi-flexible Cd(ii)-MOF
Source: Royal Society of Chemistry journal article supplement (doi:10.1039/c4cc02634a), 2014-01-01
Supplement: c4cc02634a1.pdf [file c4cc02634a1.pdf]

# A combined stretching-tilting mechanism produces negative, zero and positive linear thermal expansion in a semi-flexible Cd(II)-MOF

Prem Lama, Raj Kumar Das, Vincent J. Smith and Leonard J. Barbour\*

\* Department of Chemistry and Polymer Science, University of Stellenbosch, Stellenbosch 7600, South Africa

## Synthesis

All chemicals and solvent used in these experiments were purchased from Aldrich.

### Synthesis of $\{[\text{Cd}(\text{HBTC})(\text{BPP})] \cdot 1.5\text{DMF} \cdot 2\text{H}_2\text{O}\}_n$ , **1**

1,3,5-Benzenetricarboxylic acid (20 mg, 0.095 mmol) and 1,3-bis(4-pyridyl)propane (19 mg, 0.095 mmol) were dissolved in 4.8 mL of DMF whereas  $\text{Cd}(\text{NO}_3)_2 \cdot 4\text{H}_2\text{O}$  (29 mg, 0.095 mmol) was dissolved in 3.6 mL of water and acidified with  $\text{H}_2\text{SO}_4$  (1M, 0.2 mL). Both the solutions were heated and the hot clear solutions were combined in a sealed glass vial. The solution was heated at 80 °C for 24 hours followed by cooling to room temperature. The solution was then kept at -10 °C and after two weeks phase-pure single crystals **1** were obtained.

### Calculation of the coefficients of linear thermal expansion

The unit cell parameters of single crystals of **1** were measured at 20 K intervals. The results of the measurements are summarised in **Tables S1-S3**. These values were used to calculate the linear thermal expansion coefficient,  $\alpha$ , for each of the axes  $a$ ,  $b$  and  $c$  using the following equation:

$$\alpha = \frac{\Delta L}{L_0 \Delta T}$$

$\Delta L$  is the difference in length of the crystallographic axis,  $L_0$  is the initial axis length at the initial temperature,  $T_0$ , and  $\Delta T$  is the change in temperature. The volumetric expansion coefficient,  $\alpha_v$ , can be calculated using a modified form of the above equation, *i.e.* by substituting  $\Delta V$  for  $\Delta L$  and  $V_0$  for  $L_0$ . The standard deviations for thermal expansion coefficients are calculated using the “propagation of measurement uncertainty” method.<sup>1</sup> The crystal mosaicity remains approximately the same for the different unit cell determinations. The expansion coefficients were calculated using PAScal and Win\_strain.<sup>2,3</sup>

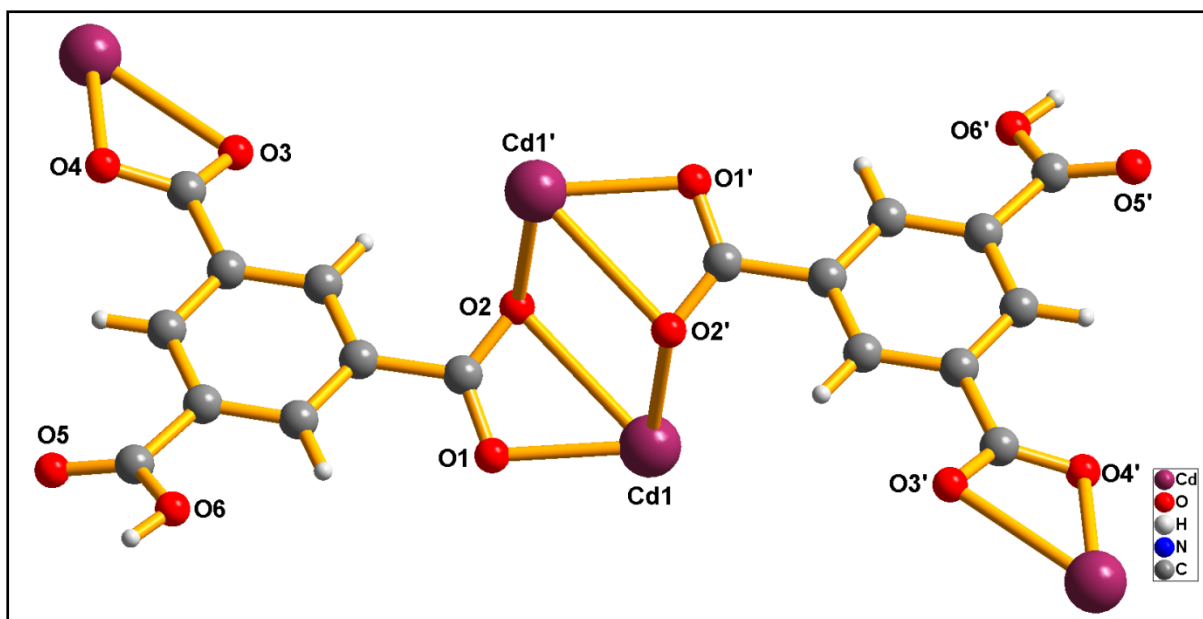

**Figure S1.** Coordination mode of carboxylic units along with dimeric  $\text{Cd}_2$  unit in **1**.

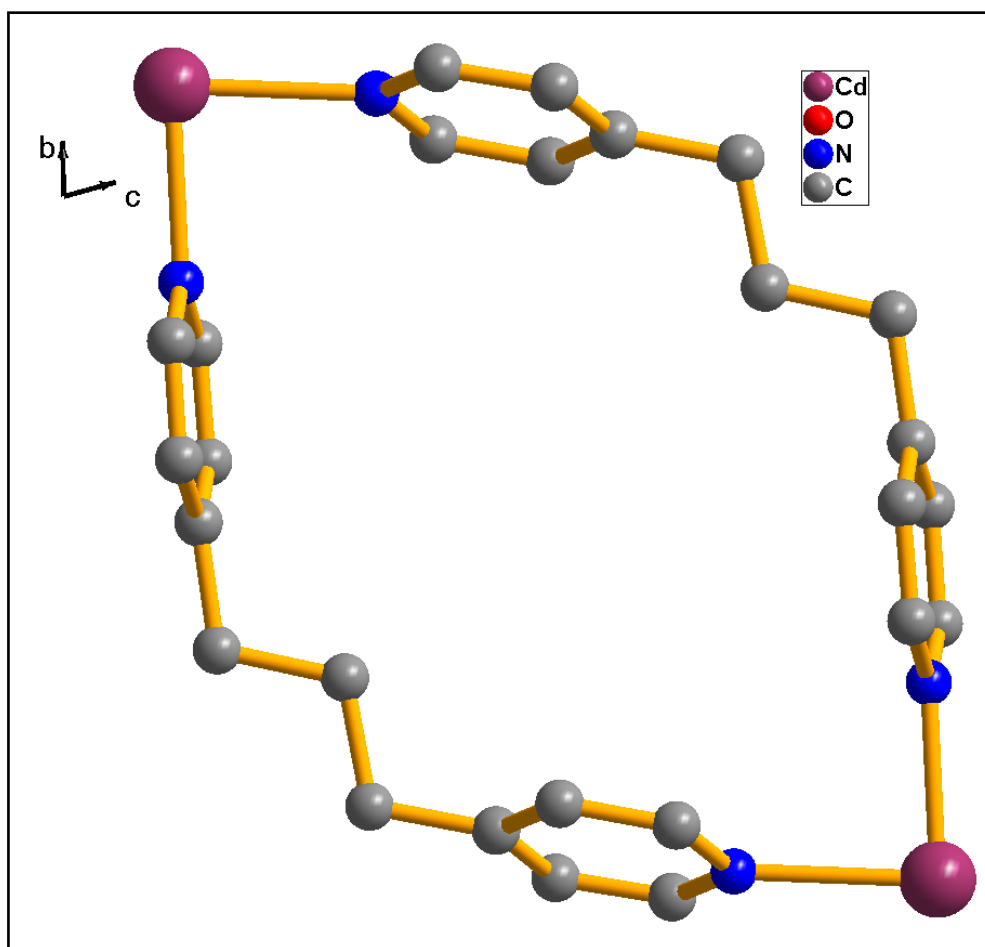

**Figure S2.** Perspective view showing schematic representation of the macrocyclic unit  $\text{Cd}_2(\text{BPP})_2$  in the crystallographic  $bc$  plane.

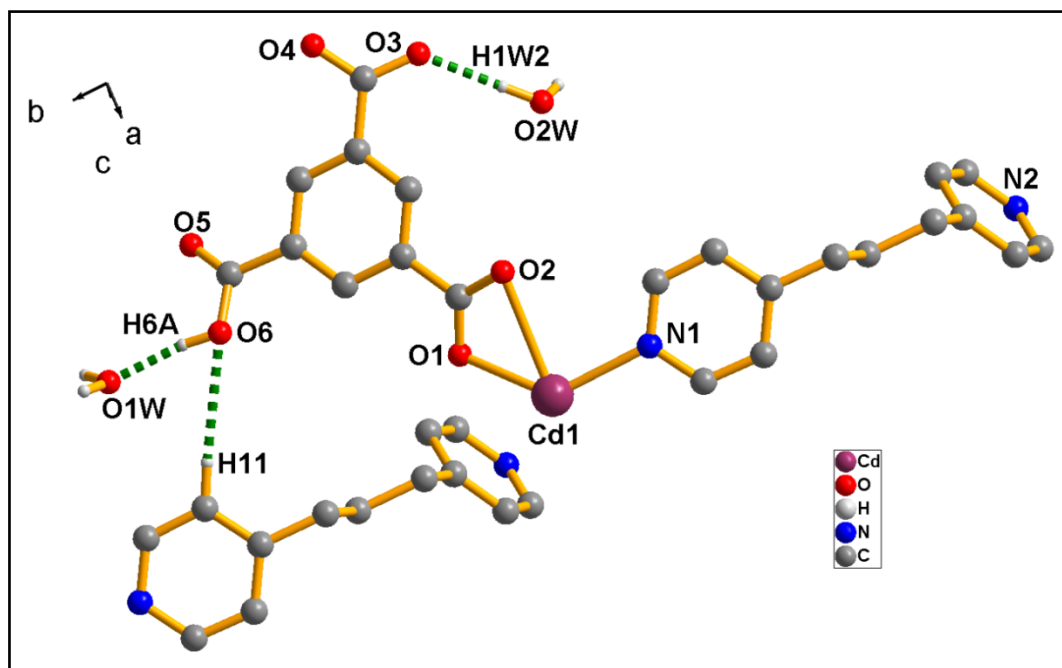

**Figure S3.** Diagram showing O–H···O and C–H···O hydrogen bonding interactions in **1**.

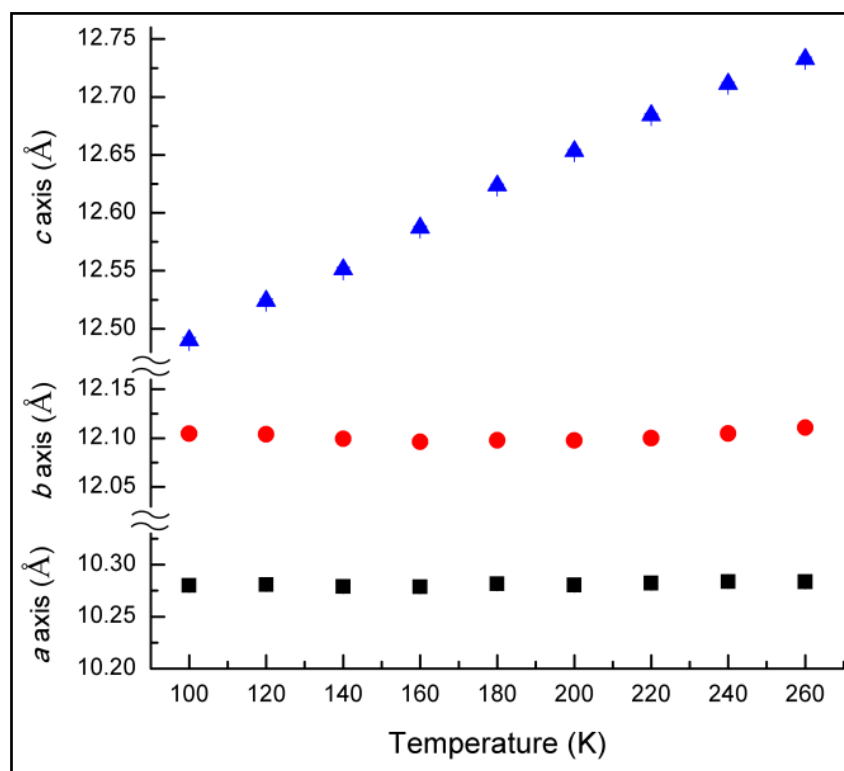

**Figure S4.** Variation of unit cell dimensions with temperature (estimated standard deviations are too small to visualize).

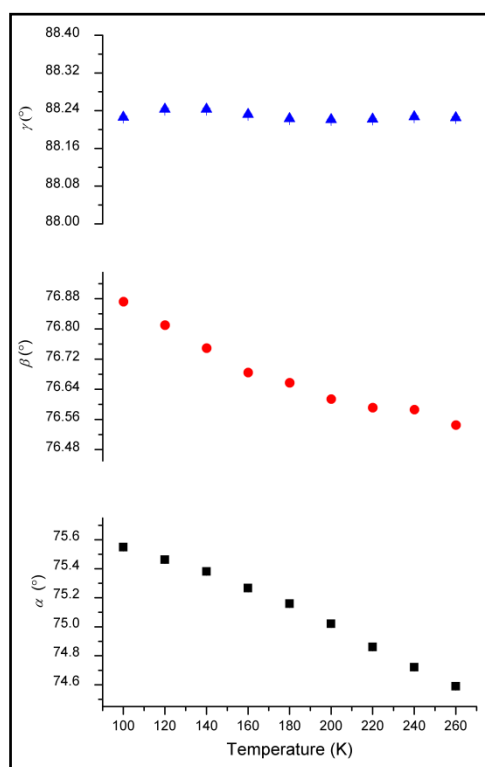

**Figure S5.** Variation of crystallographic angles (including standard deviations) with change in temperature (standard deviations are too small to visualize in the figure).

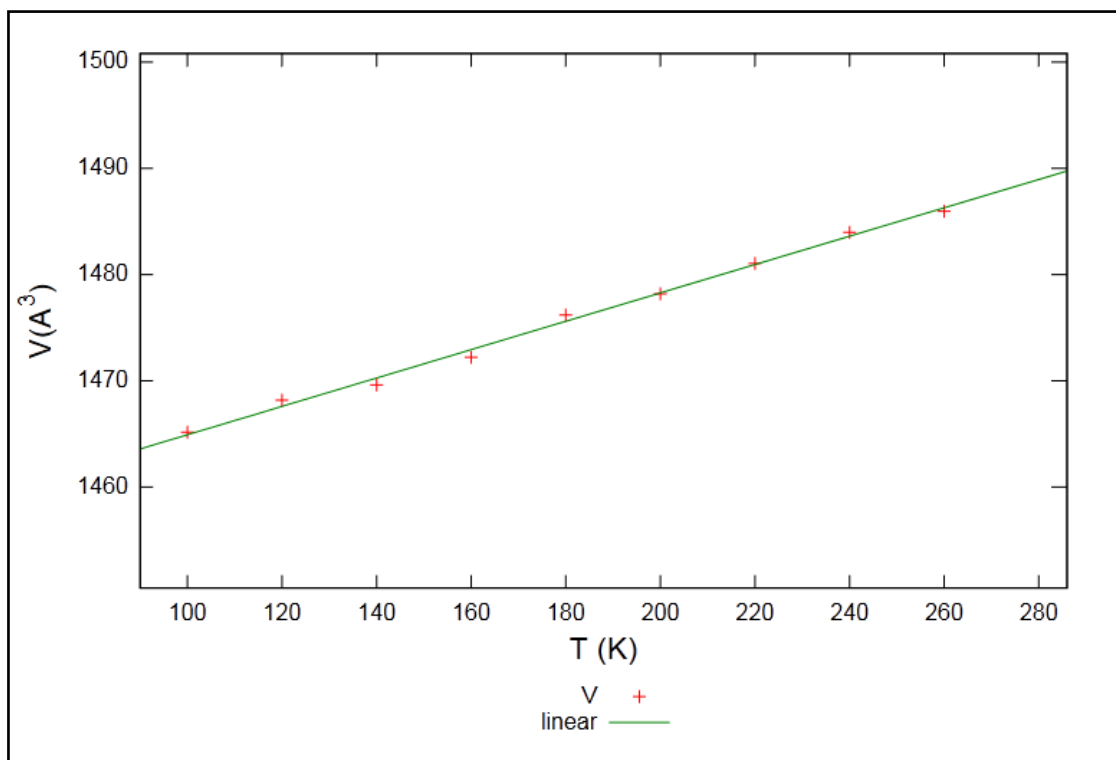

**Figure S6.** Variation of unit cell volume (including standard deviations) with change in temperature using PASCAL method.

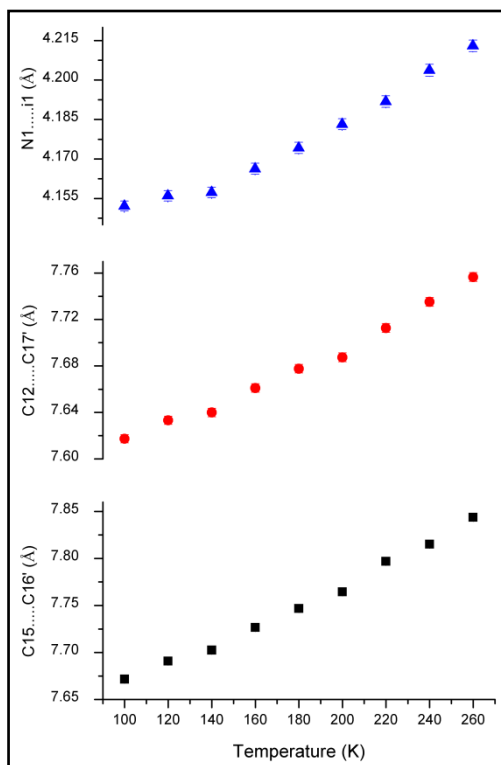

**Figure S7.** Variation of non-bonding distances (including standard deviations) upon change in temperature.

## Single Crystal X-ray Diffraction (SCD)

### *Experimental*

Single crystal X-ray diffraction data were collected on a Bruker APEX-II Quasar CCD area-detector diffractometer equipped with an Oxford Cryosystems Cryostream 700Plus cryostat. A multilayer monochromator with  $\text{Mo}_{K\alpha}$  radiation ( $\lambda = 0.71073 \text{ \AA}$ ) from an Incoatec  $I_{\mu\text{S}}$  microsource was used.

Data reduction was carried out by means of standard procedures using the Bruker software package SAINT<sup>4</sup> and absorption corrections and the correction of other systematic errors were performed using SADABS.<sup>5</sup> The structures were solved by direct methods using SHELXS-97 and refined using SHELXL-97.<sup>6</sup> X-Seed<sup>5</sup> was used as the graphical interface for the SHELX program suite. Hydrogen atoms were placed in calculated positions using riding models.

**TableS1. Crystallographic details**

| Temperature (K)   | 100                                                            | 120                                                            | 140                                                            | 160                                                            | 180                                                            |
|-------------------|----------------------------------------------------------------|----------------------------------------------------------------|----------------------------------------------------------------|----------------------------------------------------------------|----------------------------------------------------------------|
| Empirical formula | $\text{C}_{53}\text{H}_{58}\text{N}_7\text{O}_{19}\text{Cd}_2$ | $\text{C}_{53}\text{H}_{58}\text{N}_7\text{O}_{19}\text{Cd}_2$ | $\text{C}_{53}\text{H}_{58}\text{N}_7\text{O}_{19}\text{Cd}_2$ | $\text{C}_{53}\text{H}_{58}\text{N}_7\text{O}_{19}\text{Cd}_2$ | $\text{C}_{53}\text{H}_{58}\text{N}_7\text{O}_{19}\text{Cd}_2$ |
| Formula weight    | 1321.86                                                        | 1321.86                                                        | 1321.86                                                        | 1321.86                                                        | 1321.86                                                        |
| Wavelength (Å)    | 0.71073                                                        | 0.71073                                                        | 0.71073                                                        | 0.71073                                                        | 0.71073                                                        |
| Crystal system    | Triclinic                                                      | Triclinic                                                      | Triclinic                                                      | Triclinic                                                      | Triclinic                                                      |
| Space group       | $P\bar{1}$                                                     | $P\bar{1}$                                                     | $P\bar{1}$                                                     | $P\bar{1}$                                                     | $P\bar{1}$                                                     |

|                                                     |                                                               |                                                               |                                                               |                                                               |                                                               |
|-----------------------------------------------------|---------------------------------------------------------------|---------------------------------------------------------------|---------------------------------------------------------------|---------------------------------------------------------------|---------------------------------------------------------------|
| <i>a</i> , (Å)                                      | 10.2799(17)                                                   | 10.2807(14)                                                   | 10.2788(14)                                                   | 10.2786(10)                                                   | 10.2817(10)                                                   |
| <i>b</i> , (Å)                                      | 12.1045(14)                                                   | 12.1039(16)                                                   | 12.0994(16)                                                   | 12.0962(12)                                                   | 12.0978(12)                                                   |
| <i>c</i> , (Å)                                      | 12.4903(21)                                                   | 12.5241(16)                                                   | 12.5513(17)                                                   | 12.5872(13)                                                   | 12.6236(13)                                                   |
| <i>α</i> , (°)                                      | 75.549(2)                                                     | 75.460(2)                                                     | 75.381(2)                                                     | 75.267(1)                                                     | 75.159(1)                                                     |
| <i>β</i> , (°)                                      | 76.872(2)                                                     | 76.810(2)                                                     | 76.749(2)                                                     | 76.684(1)                                                     | 76.657(1)                                                     |
| <i>γ</i> , (°)                                      | 88.226(2)                                                     | 88.243(2)                                                     | 88.243(2)                                                     | 88.232(1)                                                     | 88.223(2)                                                     |
| Volume (Å <sup>3</sup> )                            | 1465.2(4)                                                     | 1468.2(3)                                                     | 1469.6(3)                                                     | 1472.2(3)                                                     | 1476.2(3)                                                     |
| <i>Z</i>                                            | 1                                                             | 1                                                             | 1                                                             | 1                                                             | 1                                                             |
| Calculated density (g cm <sup>-3</sup> )            | 1.498                                                         | 1.495                                                         | 1.494                                                         | 1.491                                                         | 1.487                                                         |
| Absorption coefficient (mm <sup>-1</sup> )          | 0.803                                                         | 0.801                                                         | 0.800                                                         | 0.799                                                         | 0.797                                                         |
| <i>F</i> <sub>000</sub>                             | 673                                                           | 673                                                           | 673                                                           | 673                                                           | 673                                                           |
| Approx. Crystal size (mm <sup>3</sup> )             | 0.114×0.198×0.605                                             | 0.114×0.198×0.606                                             | 0.114×0.198×0.608                                             | 0.114×0.198×0.610                                             | 0.113×0.198×0.611                                             |
| θ range for data collection (°)                     | 1.73 to 26.10                                                 | 1.73 to 26.09                                                 | 1.72 to 26.08                                                 | 1.72 to 26.09                                                 | 1.72 to 26.08                                                 |
| Miller index ranges                                 | -12 ≤ <i>h</i> ≤ 12, -14 ≤ <i>k</i> ≤ 14, -14 ≤ <i>l</i> ≤ 15 | -12 ≤ <i>h</i> ≤ 12, -14 ≤ <i>k</i> ≤ 14, -14 ≤ <i>l</i> ≤ 15 | -12 ≤ <i>h</i> ≤ 12, -14 ≤ <i>k</i> ≤ 14, -14 ≤ <i>l</i> ≤ 15 | -12 ≤ <i>h</i> ≤ 12, -14 ≤ <i>k</i> ≤ 14, -14 ≤ <i>l</i> ≤ 15 | -12 ≤ <i>h</i> ≤ 12, -14 ≤ <i>k</i> ≤ 14, -14 ≤ <i>l</i> ≤ 15 |
| Reflections collected                               | 12840                                                         | 12959                                                         | 12990                                                         | 13075                                                         | 13056                                                         |
| Independent reflections                             | 5762 [ <i>R</i> <sub>int</sub> = 0.0289]                      | 5793 [ <i>R</i> <sub>int</sub> = 0.0272]                      | 5795 [ <i>R</i> <sub>int</sub> = 0.0262]                      | 5821 [ <i>R</i> <sub>int</sub> = 0.0265]                      | 5828 [ <i>R</i> <sub>int</sub> = 0.0268]                      |
| Completeness to θ <sub>max</sub> (%)                | 99.0                                                          | 99.4                                                          | 99.4                                                          | 99.5                                                          | 99.4                                                          |
| Max. and min. transmission                          | 0.9141 and 0.6423                                             | 0.9142 and 0.6424                                             | 0.9143 and 0.6419                                             | 0.9144 and 0.6415                                             | 0.9144 and 0.6415                                             |
| Refinement method                                   | Full-matrix least-squares on <i>F</i> <sup>2</sup>            |
| Data / restraints / parameters                      | 5762 / 4 / 440                                                | 5793 / 4 / 441                                                | 5795 / 4 / 446                                                | 5821 / 4 / 441                                                | 5828 / 4 / 449                                                |
| Goodness-of-fit on <i>F</i> <sup>2</sup>            | 1.040                                                         | 1.053                                                         | 1.065                                                         | 1.006                                                         | 1.045                                                         |
| Final <i>R</i> indices [ <i>I</i> > 2σ( <i>I</i> )] | <i>R</i> 1 = 0.0269, <i>wR</i> 2 = 0.0692                     | <i>R</i> 1 = 0.0264, <i>wR</i> 2 = 0.0650                     | <i>R</i> 1 = 0.0261, <i>wR</i> 2 = 0.0643                     | <i>R</i> 1 = 0.0272, <i>wR</i> 2 = 0.0710                     | <i>R</i> 1 = 0.0271, <i>wR</i> 2 = 0.0658                     |
| <i>R</i> indices (all data)                         | <i>R</i> 1 = 0.0291, <i>wR</i> 2 = 0.0707                     | <i>R</i> 1 = 0.0287, <i>wR</i> 2 = 0.0664                     | <i>R</i> 1 = 0.0284, <i>wR</i> 2 = 0.0657                     | <i>R</i> 1 = 0.0295, <i>wR</i> 2 = 0.0727                     | <i>R</i> 1 = 0.0296, <i>wR</i> 2 = 0.0673                     |
| Largest diff. peak and hole (e Å <sup>-3</sup> )    | 0.651 and -0.507                                              | 0.580 and -0.470                                              | 0.565 and -0.562                                              | 0.596 and -0.610                                              | 0.577 and -0.404                                              |
| CCDC number                                         | 984355                                                        | 984356                                                        | 984357                                                        | 984358                                                        | 984359                                                        |

| Temperature (K)                            | 200                                                                            | 220                                                                            | 240                                                                            | 260                                                                            | 100-R                                                                          |
|--------------------------------------------|--------------------------------------------------------------------------------|--------------------------------------------------------------------------------|--------------------------------------------------------------------------------|--------------------------------------------------------------------------------|--------------------------------------------------------------------------------|
| Empirical formula                          | C <sub>53</sub> H <sub>58</sub> N <sub>7</sub> O <sub>19</sub> Cd <sub>2</sub> | C <sub>53</sub> H <sub>58</sub> N <sub>7</sub> O <sub>19</sub> Cd <sub>2</sub> | C <sub>53</sub> H <sub>58</sub> N <sub>7</sub> O <sub>19</sub> Cd <sub>2</sub> | C <sub>53</sub> H <sub>58</sub> N <sub>7</sub> O <sub>19</sub> Cd <sub>2</sub> | C <sub>53</sub> H <sub>58</sub> N <sub>7</sub> O <sub>19</sub> Cd <sub>2</sub> |
| Formula weight                             | 1321.86                                                                        | 1321.86                                                                        | 1321.86                                                                        | 1321.86                                                                        | 1321.86                                                                        |
| Wavelength (Å)                             | 0.71073                                                                        | 0.71073                                                                        | 0.71073                                                                        | 0.71073                                                                        | 0.71073                                                                        |
| Crystal system                             | Triclinic                                                                      | Triclinic                                                                      | Triclinic                                                                      | Triclinic                                                                      | Triclinic                                                                      |
| Space group                                | <i>P</i> $\bar{1}$                                                             |
| <i>a</i> , (Å)                             | 10.2804(9)                                                                     | 10.2816(9)                                                                     | 10.2837(10)                                                                    | 10.2835(13)                                                                    | 10.2731(6)                                                                     |
| <i>b</i> , (Å)                             | 12.0976(11)                                                                    | 12.0994(10)                                                                    | 12.1048(12)                                                                    | 12.1107(15)                                                                    | 12.1111(7)                                                                     |
| <i>c</i> , (Å)                             | 12.6532(11)                                                                    | 12.6836(11)                                                                    | 12.7112(13)                                                                    | 12.7326(16)                                                                    | 12.4854(7)                                                                     |
| <i>α</i> , (°)                             | 75.021(1)                                                                      | 74.861(1)                                                                      | 74.721(1)                                                                      | 74.590(2)                                                                      | 75.519(1)                                                                      |
| <i>β</i> , (°)                             | 76.614(1)                                                                      | 76.591(1)                                                                      | 76.586(2)                                                                      | 76.545(2)                                                                      | 76.822(1)                                                                      |
| <i>γ</i> , (°)                             | 88.221(1)                                                                      | 88.222(1)                                                                      | 88.227(2)                                                                      | 88.255(2)                                                                      | 88.265(1)                                                                      |
| Volume (Å <sup>3</sup> )                   | 1478.2(2)                                                                      | 1480.8(2)                                                                      | 1484.0(3)                                                                      | 1485.9(3)                                                                      | 1463.9(2)                                                                      |
| <i>Z</i>                                   | 1                                                                              | 1                                                                              | 1                                                                              | 1                                                                              | 1                                                                              |
| Calculated density (g cm <sup>-3</sup> )   | 1.485                                                                          | 1.482                                                                          | 1.479                                                                          | 1.477                                                                          | 1.499                                                                          |
| Absorption coefficient (mm <sup>-1</sup> ) | 0.796                                                                          | 0.794                                                                          | 0.792                                                                          | 0.791                                                                          | 0.803                                                                          |
| <i>F</i> <sub>000</sub>                    | 673                                                                            | 673                                                                            | 673                                                                            | 673                                                                            | 673                                                                            |
| Approx. Crystal size (mm <sup>3</sup> )    | 0.113×0.198×0.612                                                              | 0.113×0.199×0.614                                                              | 0.112×0.199×0.615                                                              | 0.112×0.199×0.617                                                              | 0.114×0.198×0.605                                                              |
| θ range for data collection (°)            | 1.73 to 26.10                                                                  | 1.71 to 26.02                                                                  | 1.71 to 26.03                                                                  | 1.71 to 26.37                                                                  | 1.73 to 26.05                                                                  |
| Miller index ranges                        | -12 ≤ <i>h</i> ≤ 12, -14 ≤ <i>k</i> ≤ 14, -14 ≤ <i>l</i> ≤ 15                  | -12 ≤ <i>h</i> ≤ 12, -14 ≤ <i>k</i> ≤ 14, -14 ≤ <i>l</i> ≤ 15                  | -12 ≤ <i>h</i> ≤ 12, -14 ≤ <i>k</i> ≤ 14, -15 ≤ <i>l</i> ≤ 15                  | -12 ≤ <i>h</i> ≤ 12, -15 ≤ <i>k</i> ≤ 15, -15 ≤ <i>l</i> ≤ 15                  | -12 ≤ <i>h</i> ≤ 12, -14 ≤ <i>k</i> ≤ 14, -15 ≤ <i>l</i> ≤ 15                  |

|                                                      |                                    |                                    |                                    |                                    |                                    |
|------------------------------------------------------|------------------------------------|------------------------------------|------------------------------------|------------------------------------|------------------------------------|
| Reflections collected                                | 13055                              | 13046                              | 13102                              | 13453                              | 17032                              |
| Independent reflections                              | 5817 [ $R_{\text{int}} = 0.0255$ ] | 5808 [ $R_{\text{int}} = 0.0240$ ] | 5822 [ $R_{\text{int}} = 0.0246$ ] | 6028 [ $R_{\text{int}} = 0.0264$ ] | 6028 [ $R_{\text{int}} = 0.0246$ ] |
| Completeness to $\theta_{\text{max}}$ (%)            | 99.5                               | 99.4                               | 99.4                               | 99.4                               | 99.9                               |
| Max. and min. transmission                           | 0.9155 and 0.6417                  | 0.9156 and 0.6413                  | 0.9165 and 0.6414                  | 0.9166 and 0.6409                  | 0.9140 and 0.6421                  |
| Refinement method                                    | Full-matrix least-squares on $F^2$ |
| Data / restraints / parameters                       | 5817 / 4 / 441                     | 5808 / 5 / 449                     | 5822 / 5 / 443                     | 6028 / 4 / 430                     | 5791 / 4 / 440                     |
| Goodness-of-fit on $F^2$                             | 1.007                              | 1.043                              | 1.067                              | 1.037                              | 1.070                              |
| Final $R$ indices [ $I > 2\sigma(I)$ ]               | $R1 = 0.0270$ , $wR2 = 0.0702$     | $R1 = 0.0270$ , $wR2 = 0.0660$     | $R1 = 0.0279$ , $wR2 = 0.0681$     | $R1 = 0.0300$ , $wR2 = 0.0725$     | $R1 = 0.0207$ , $wR2 = 0.0522$     |
| $R$ indices (all data)                               | $R1 = 0.0297$ , $wR2 = 0.0722$     | $R1 = 0.0300$ , $wR2 = 0.0679$     | $R1 = 0.0311$ , $wR2 = 0.0699$     | $R1 = 0.0342$ , $wR2 = 0.0752$     | $R1 = 0.0219$ , $wR2 = 0.0530$     |
| Largest diff. peak and hole ( $e \text{ \AA}^{-3}$ ) | 0.613 and -0.472                   | 0.503 and -0.428                   | 0.508 and -0.380                   | 0.511 and -0.406                   | 0.586 and -0.357                   |
| CCDC number                                          | 984360                             | 984361                             | 984362                             | 984363                             | 984364                             |

#### Details about the refinement of the SCD structures:

For all structures the hydrogen atom of the water molecules were fixed using DFIX and DANG refinement. The disorder of the lattice DMF molecules was modelled in all of the structures.

#### Structural Analysis

All the non-bonding distances and angles were measured using the program X-Seed.<sup>7</sup>

**TableS2.** Unit cell axes and crystal volume at variable temperatures for **1**.

| $T$ (K) | Unit cell parameters |           |         |           |         |            |                               |            | Crystal mosaicity |
|---------|----------------------|-----------|---------|-----------|---------|------------|-------------------------------|------------|-------------------|
|         | $a$ (Å)              | St. dev.* | $b$ (Å) | St. dev.* | $c$ (Å) | St. dev. * | Cell volume (Å <sup>3</sup> ) | St. dev. * |                   |
| 100     | 10.2799              | 0.0017    | 12.1045 | 0.0021    | 12.4903 | 0.0021     | 1465.2                        | 4          | 0.64              |
| 120     | 10.2807              | 0.0014    | 12.1039 | 0.0016    | 12.5241 | 0.0016     | 1468.2                        | 3          | 0.63              |
| 140     | 10.2788              | 0.0014    | 12.0994 | 0.0016    | 12.5513 | 0.0017     | 1469.6                        | 3          | 0.63              |
| 160     | 10.2786              | 0.0010    | 12.0962 | 0.0012    | 12.5872 | 0.0013     | 1472.2                        | 3          | 0.63              |
| 180     | 10.2817              | 0.0010    | 12.0978 | 0.0012    | 12.6236 | 0.0013     | 1476.2                        | 3          | 0.65              |
| 200     | 10.2804              | 0.0009    | 12.0976 | 0.0011    | 12.6532 | 0.0011     | 1478.2                        | 2          | 0.66              |
| 220     | 10.2821              | 0.0009    | 12.0999 | 0.0010    | 12.6842 | 0.0011     | 1480.8                        | 2          | 0.66              |
| 240     | 10.2837              | 0.0010    | 12.1048 | 0.0012    | 12.7112 | 0.0013     | 1484.0                        | 3          | 0.68              |
| 260     | 10.2835              | 0.0013    | 12.1107 | 0.0015    | 12.7326 | 0.0016     | 1485.9                        | 3          | 0.66              |
| 100-R   | 10.2731              | 0.0006    | 12.1111 | 0.0007    | 12.4854 | 0.0007     | 1463.9                        | 2          | 0.64              |

\*Standard deviation calculated from unit cell refinement using the Apex II software suite.

**TableS3.** Unit cell axes and crystal volume at variable temperatures for **1**.

| $T$ (K) | Unit cell parameters |           |             |           |              |            |
|---------|----------------------|-----------|-------------|-----------|--------------|------------|
|         | $\alpha$ (°)         | St. dev.* | $\beta$ (°) | St. dev.* | $\gamma$ (°) | St. dev. * |
| 100     | 75.549               | 0.002     | 76.872      | 0.002     | 88.226       | 0.002      |
| 120     | 75.462               | 0.002     | 76.81       | 0.002     | 88.243       | 0.002      |
| 140     | 75.381               | 0.002     | 76.749      | 0.002     | 88.243       | 0.002      |
| 160     | 75.267               | 0.001     | 76.684      | 0.001     | 88.232       | 0.001      |
| 180     | 75.159               | 0.001     | 76.657      | 0.001     | 88.223       | 0.001      |
| 200     | 75.021               | 0.002     | 76.614      | 0.001     | 88.221       | 0.001      |
| 220     | 74.861               | 0.001     | 76.591      | 0.001     | 88.222       | 0.001      |
| 240     | 74.721               | 0.001     | 76.586      | 0.002     | 88.227       | 0.002      |
| 260     | 74.590               | 0.002     | 76.545      | 0.002     | 88.225       | 0.002      |
| 100-R   | 75.519               | 0.001     | 76.822      | 0.001     | 88.265       | 0.001      |

\*Standard deviation calculated from unit cell refinement using the Apex II Data collection software suite.

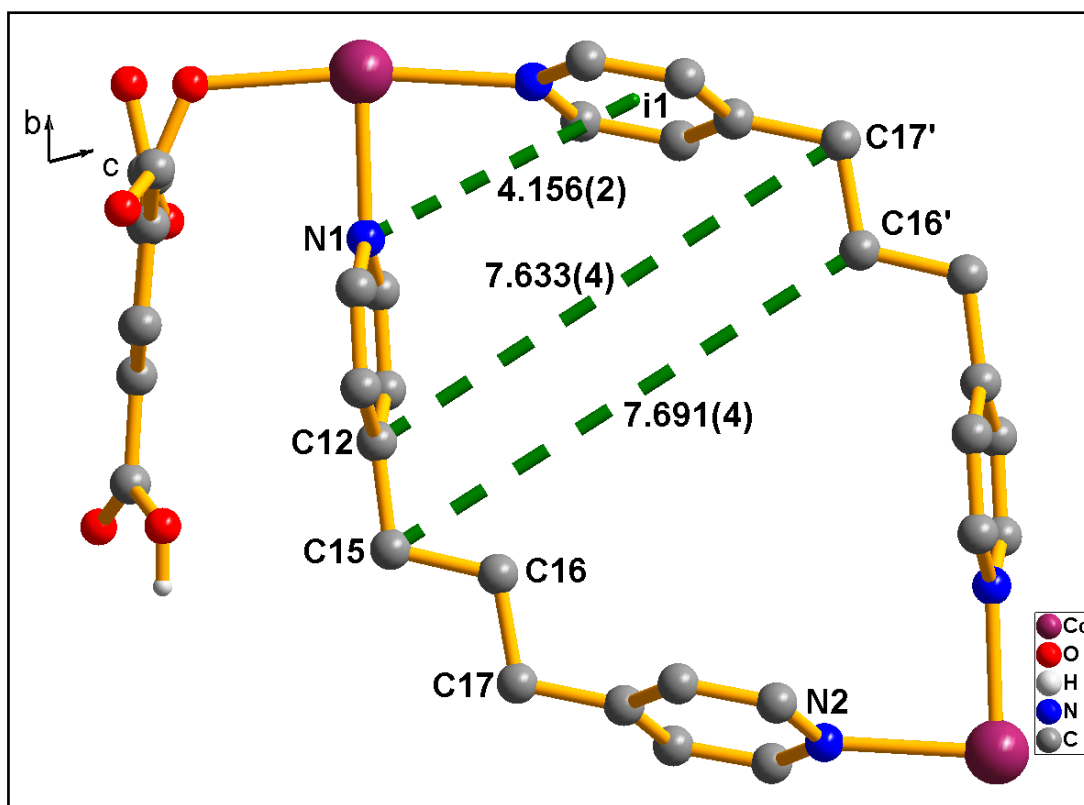

**Figure S8.** Diagram showing selected non-bonding distances within the macrocyclic unit in **1** at 120 K.

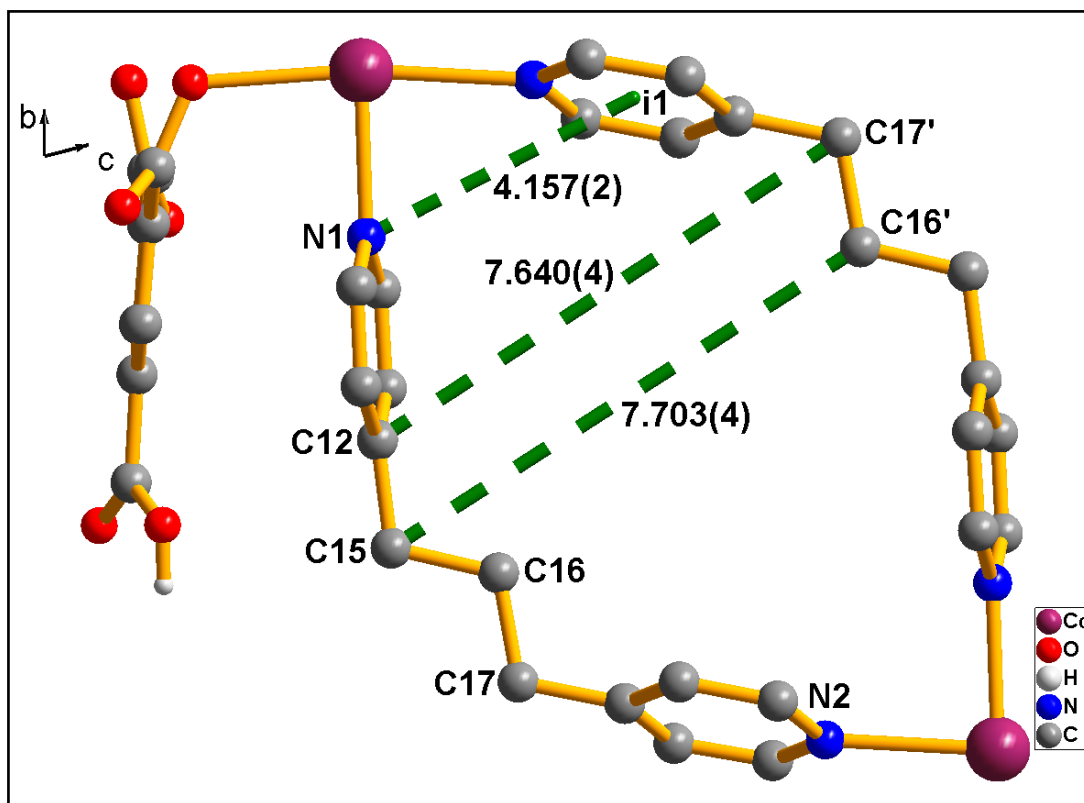

**Figure S9.** Diagram showing selected non-bonding distances within the macrocyclic unit in **1** at 140 K.

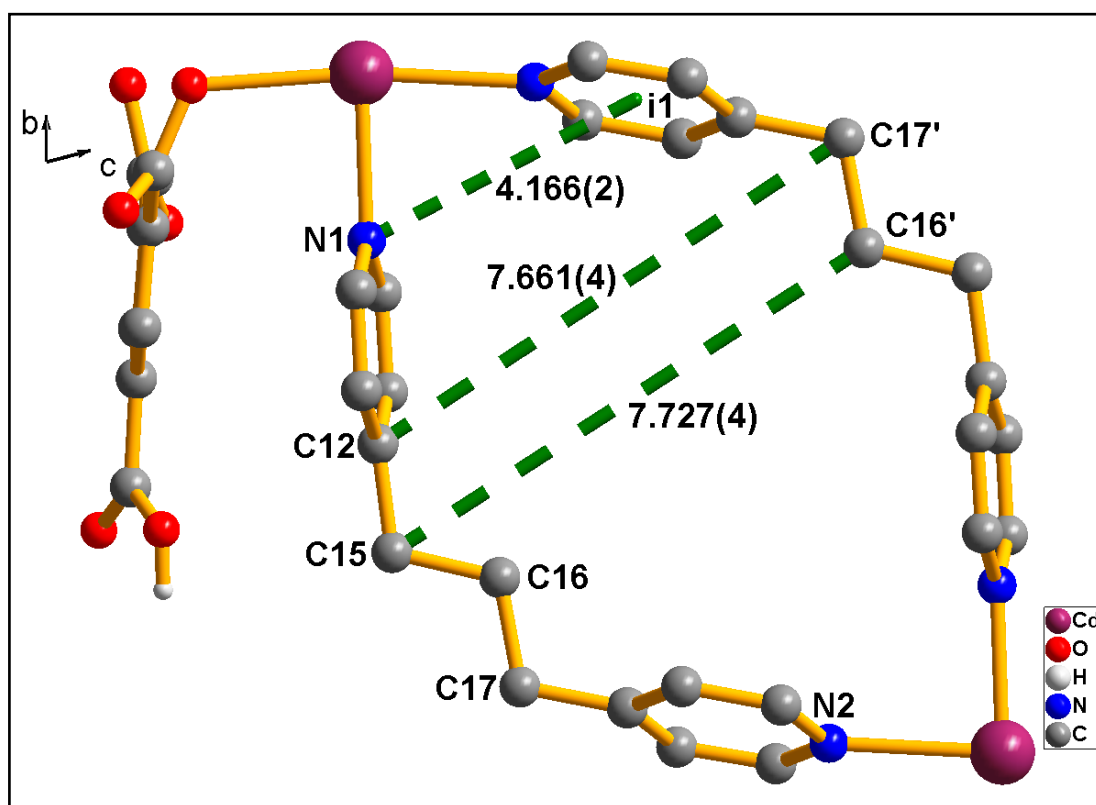

**Figure S10.** Diagram showing selected non-bonding distances within the macrocyclic unit in **1** at 160 K.

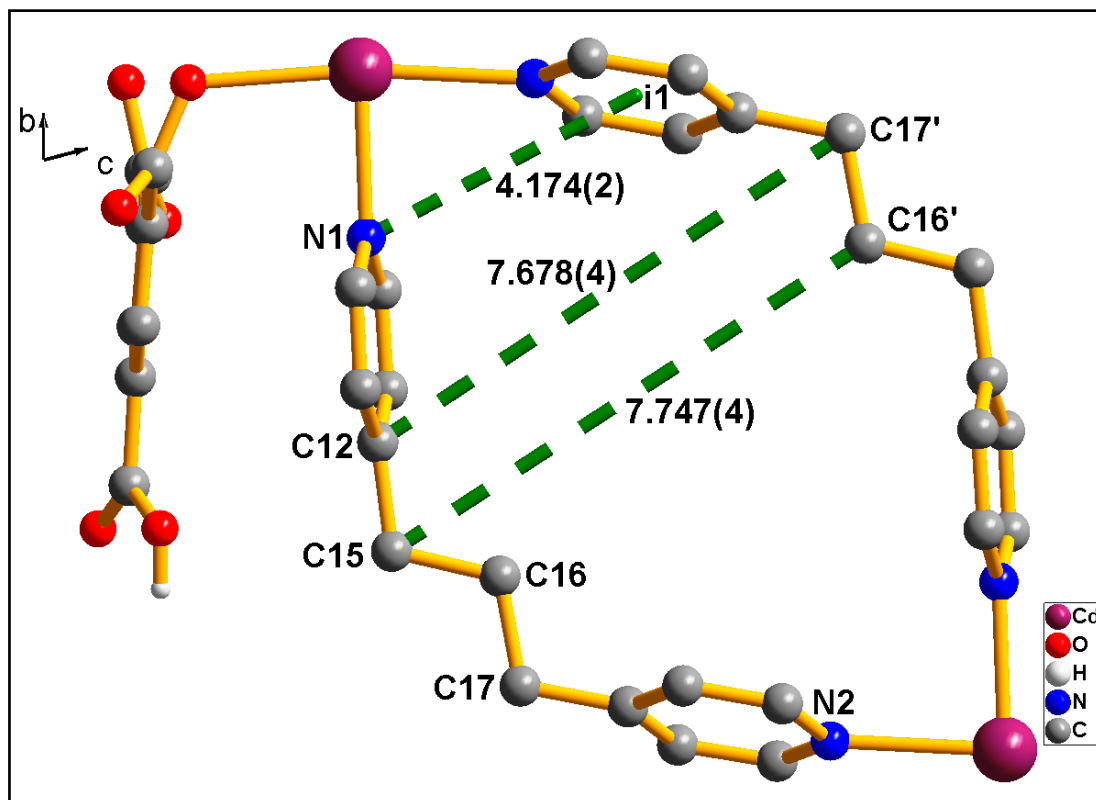

**Figure S11.** Diagram showing selected non-bonding distances within the macrocyclic unit in **1** at 180 K.

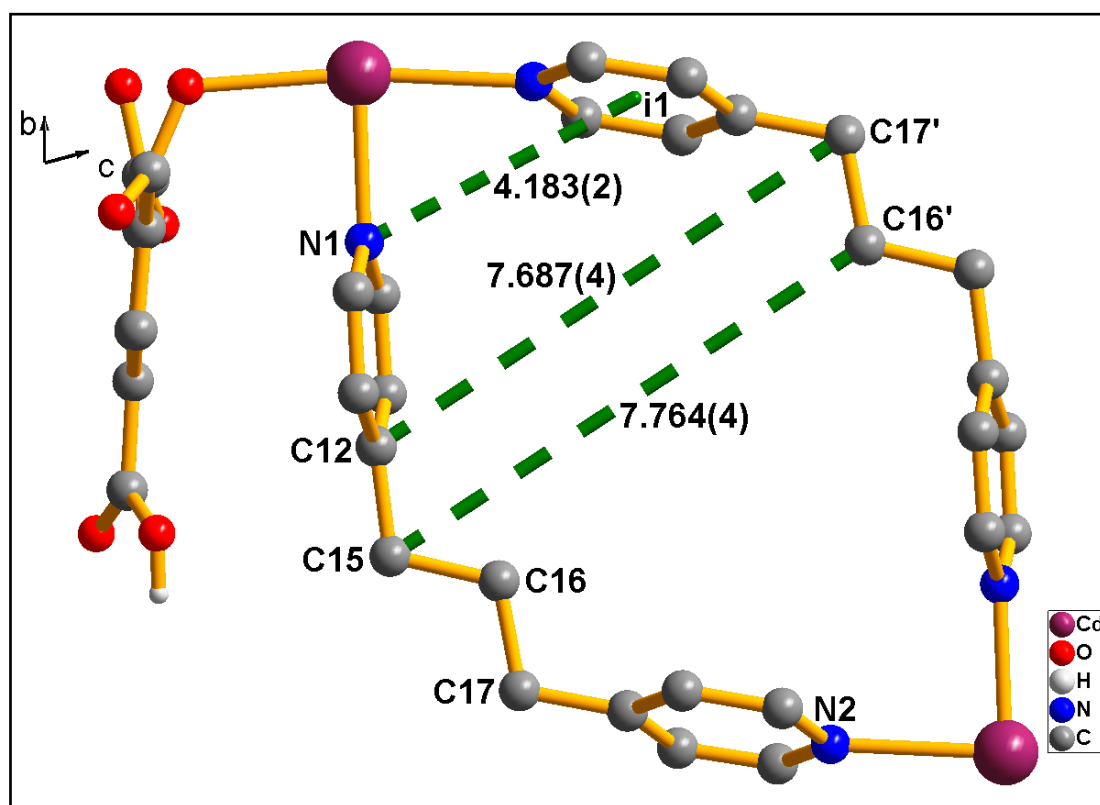

**Figure S12.** Diagram showing selected non-bonding distances within the macrocyclic unit in **1** at 200 K.

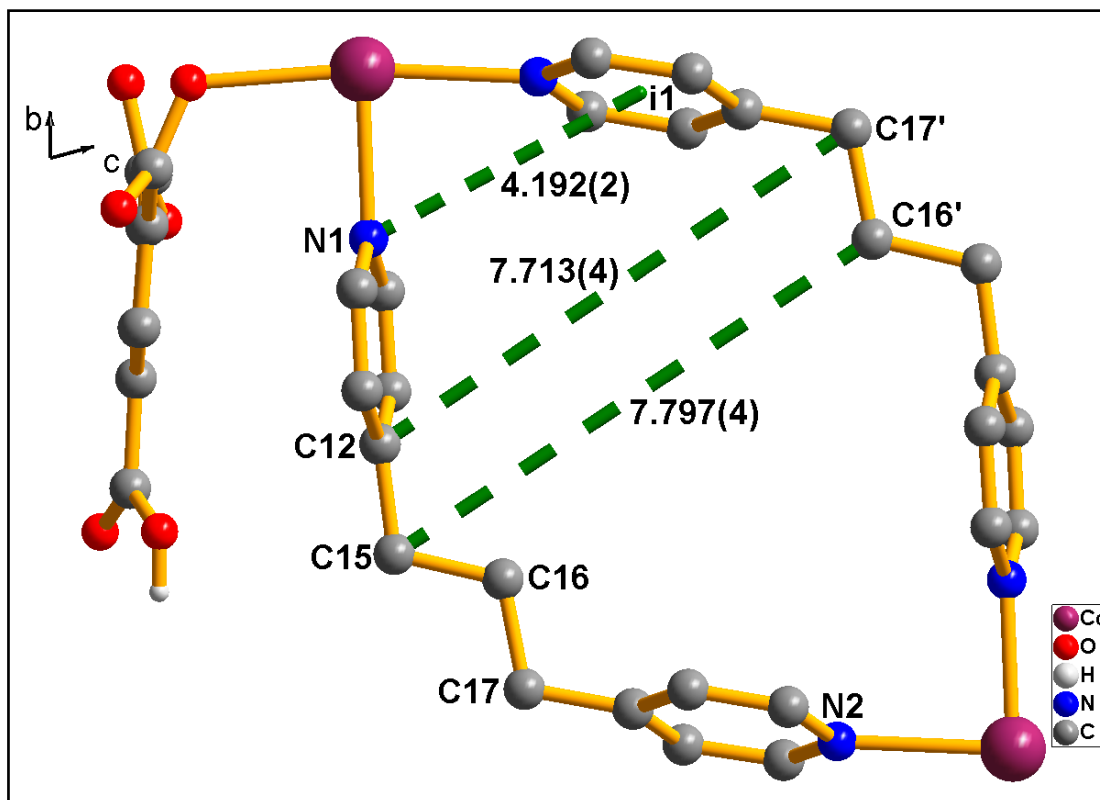

**Figure S13.** Diagram showing selected non-bonding distances within the macrocyclic unit in **1** at 220 K.

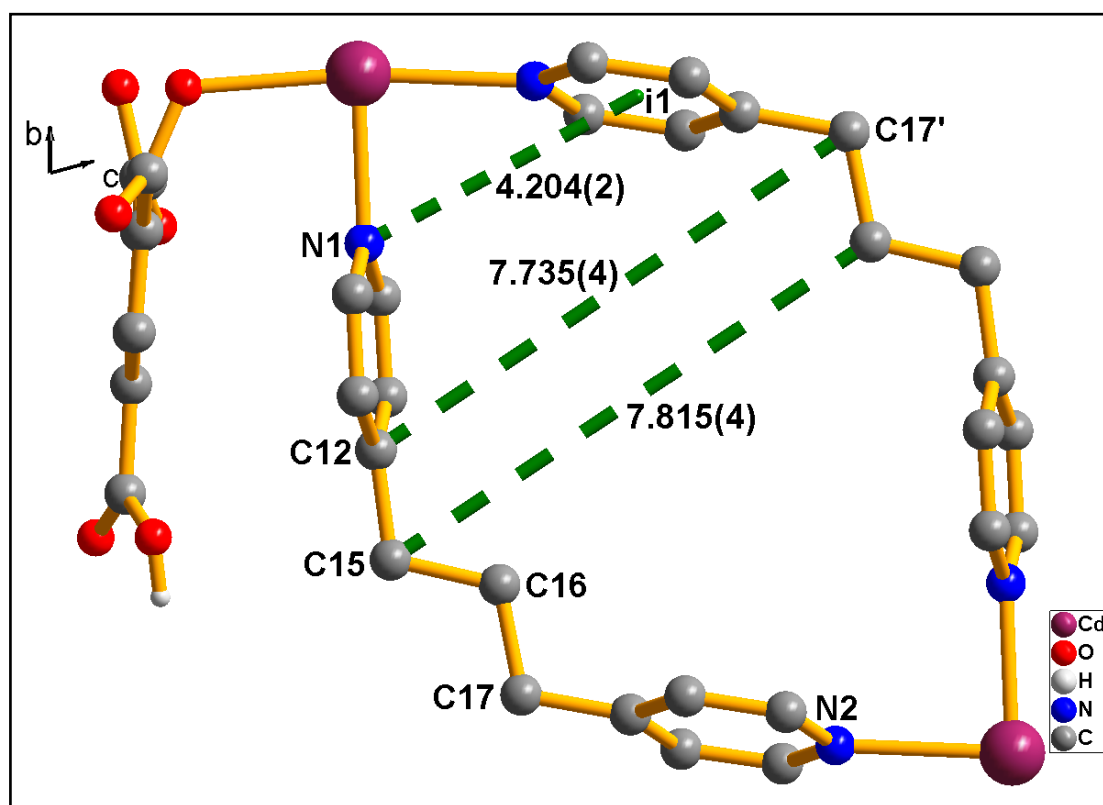

**Figure S14.** Diagram showing selected non-bonding distances within the macrocyclic unit in **1** at 240 K.

**TableS4.** List of hydrogen-bonding distances and angles between the lattice water molecules and carboxylate/carboxylic acid groups in **1** at 100 K and 260 K.

|          | O6-H6A... O1W |          | O2W-H1W2... O3 |          |
|----------|---------------|----------|----------------|----------|
|          | 100 K         | 260 K    | 100 K          | 260 K    |
| d(D-H)   | 0.840(2)      | 0.820(2) | 0.899(2)       | 0.846(2) |
| d(H...A) | 1.741(2)      | 1.772(2) | 1.893(2)       | 1.982(2) |
| d(D...A) | 2.572(2)      | 2.582(3) | 2.792(2)       | 2.802(3) |
| <DHA     | 169.7(1)      | 169.0(2) | 178.3(1)       | 163.2(2) |

### Powder X-ray Diffraction (PXRD)

To ascertain whether the anomalous thermal expansion observed in a single crystal also manifests in the bulk material, PXRD patterns of **1** were measured at various temperatures (Figures 6 and S16). Experiments were carried out on a PANalytical X'Pert PRO instrument with Bragg-Brentano geometry. Intensity data were collected using an X'Celerator detector and  $2\theta$  scans in the range of 5-40° were performed. During the experiment the powdered sample was exposed to Cu-K $\alpha$  radiation ( $\lambda = 1.5418$  Å). The sample was sealed within a glass capillary and the capillary spinner configuration (with focusing mirror) of the instrument was used since this setup allows for very accurate temperature control using an Oxford Cryostream Plus cryostat.

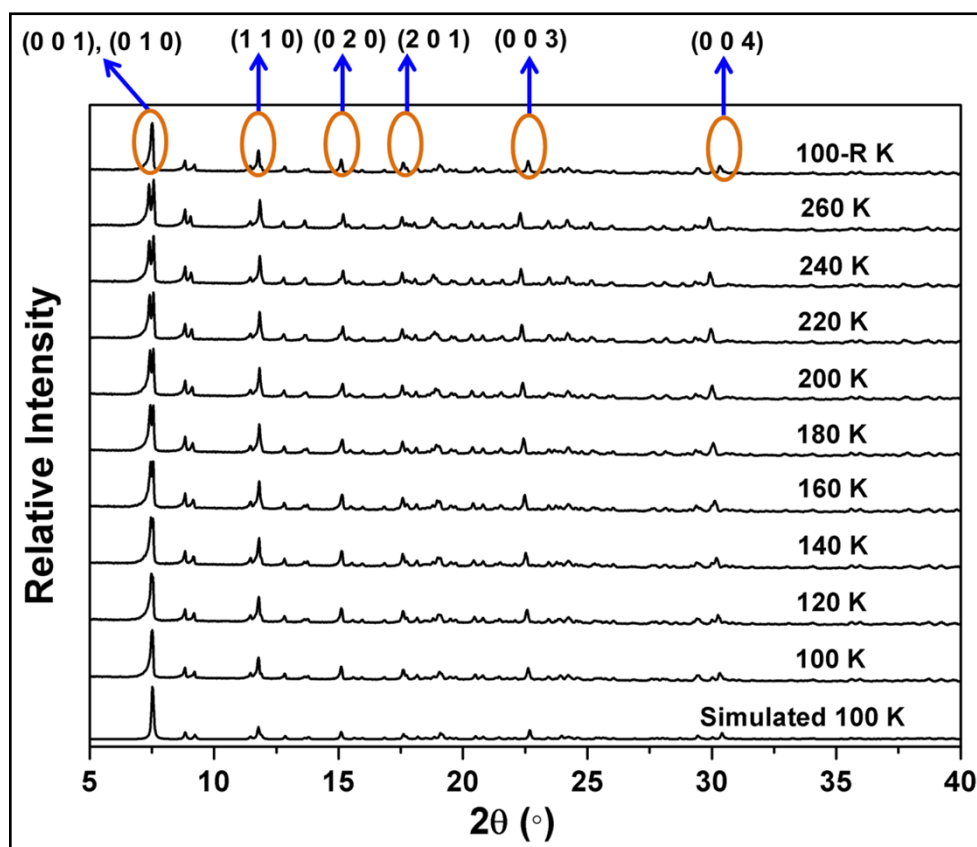

Figure S15. The simulated and measured PXRD patterns of **1** in the temperature range 100–260 K.

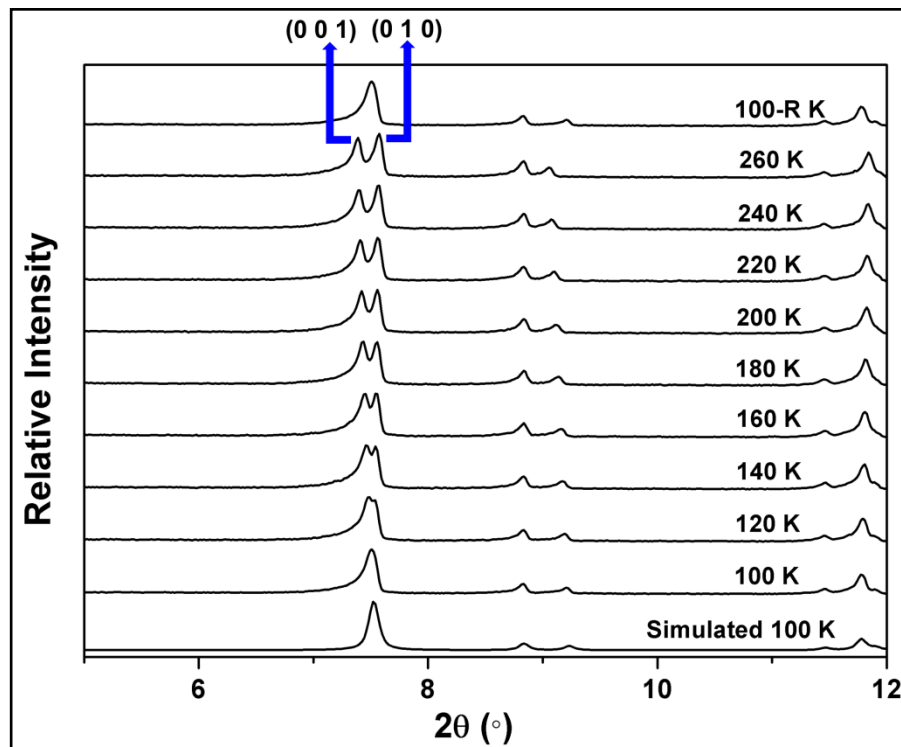

Figure S16. The simulated and measured PXRD patterns, magnified by plotting the range;  $2\theta = 5^\circ$  to  $12^\circ$  only.

### Differential scanning calorimetry analysis

Differential scanning calorimetry (DSC) measurement was carried out at the heating rate of  $10\text{ }^{\circ}\text{C min}^{-1}$  in the temperature range of 100-260 K, under nitrogen flow of  $50\text{ mL min}^{-1}$  on a DSC Q100 instrument. 3.22 mg of sample was placed in an aluminum pan with a lid. An empty sealed pan was used as a reference.

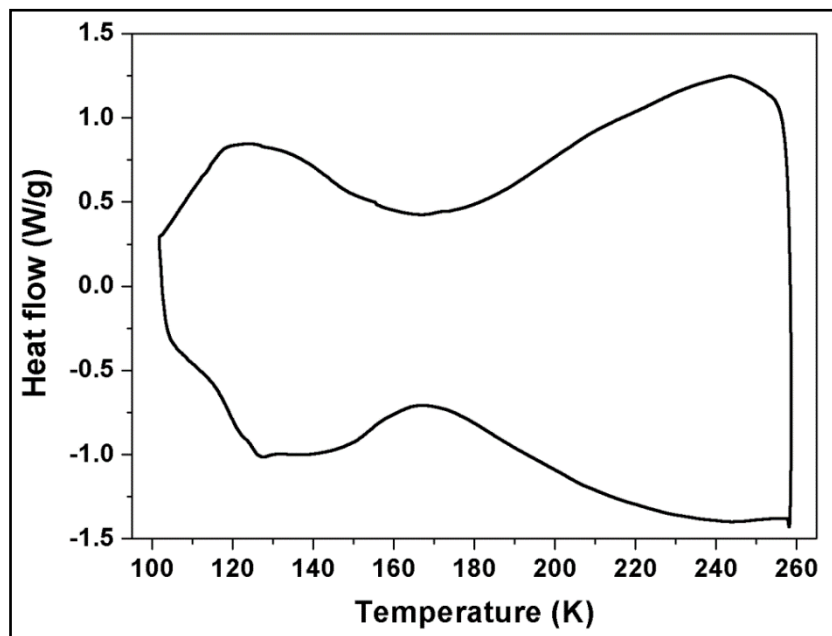

**Figure S17.** Differential scanning calorimetric thermogram of **1** in the temperature range 100-260 K.

### Thermogravimetric analysis

The TGA trace was obtained using a TA Instruments Q500 thermogravimetric analyser. The sample was heated at  $10\text{ }^{\circ}\text{C min}^{-1}$ , Figure S17.

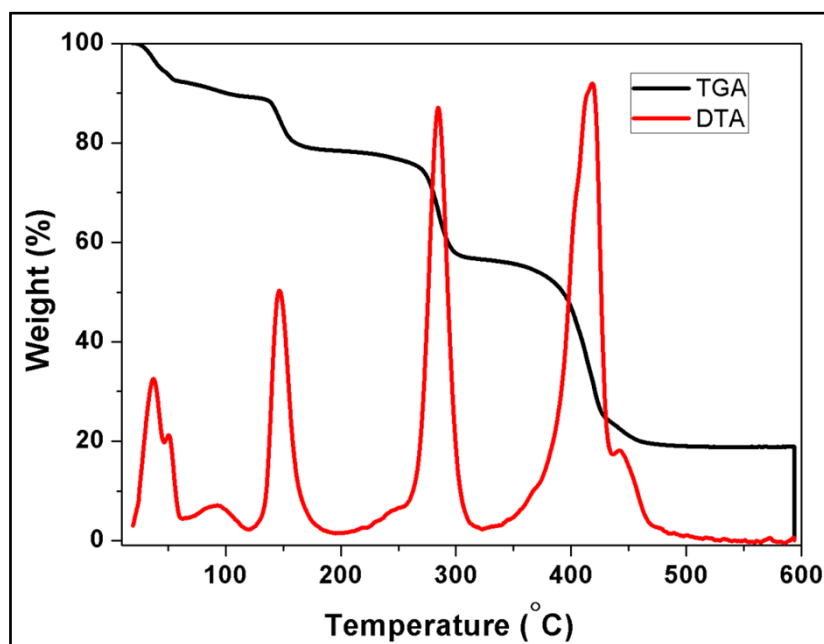

**Figure S18.** Thermogravimetric analysis of **1**.

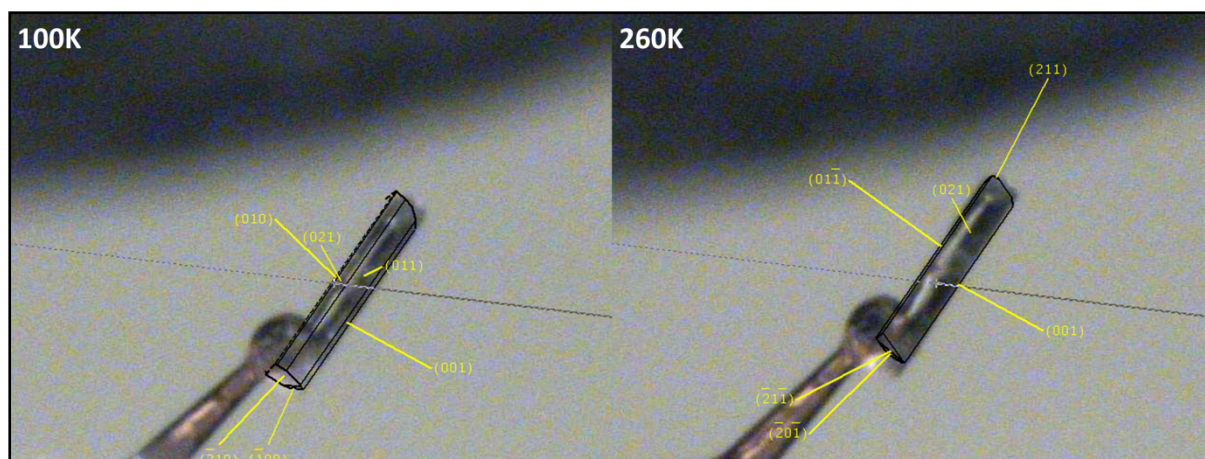

**Figure S19.** Face-indexing of **1** at 100 K and 260 K using the APEX II software suite. At 100 K and 260 K the crystal dimensions are 0.093 x 0.273 x 0.605 mm and 0.095 x 0.273 x 0.606 mm, respectively.

\*\*\*\*\*

## STRAIN PROGRAM

VERSION 4.11 - RJA NOV 2011

\*\*\*\*\*

\*\*\*\*\***OUTPUT FROM CALCULATION NO. 1**\*\*\*\*\*

### CELL PARAMETERS

BEFORE 10.27990 12.10450 12.49030 75.54900 76.87200 88.22600 AT P = 0.000 AND T = 100.00

ESD 0.00170 0.00210 0.00210 0.00200 0.00200 0.00200 0.000 2.00

AFTER 10.28350 12.11070 12.73260 74.59000 76.54500 88.22500 AT P = 0.000 AND T = 260.00

ESD 0.00130 0.00150 0.00160 0.00200 0.00200 0.00200 0.000 2.00

### RECIPROCAL CELL PARAMETERS

BEFORE 0.09992 0.08534 0.08489 104.42712 103.10162 88.43700

AFTER 0.10004 0.08570 0.08377 105.42285 103.46980 88.11414

CARTESIAN AXES SET WITH X//A\* AND Z//C: IRE CONVENTION

ANGLES BETWEEN XYZ AND ABC SYSTEMS

FOR LAGRANGIAN STRAINS TO CELL 1

|    | +A    | +B    | +C    |
|----|-------|-------|-------|
| +X | 13.22 | 90.00 | 90.00 |
| +Y | 91.52 | 14.45 | 90.00 |
| +Z | 76.87 | 75.55 | 0.00  |

FOR EULERIAN STRAINS TO CELL 2

|    | +A    | +B    | +C    |
|----|-------|-------|-------|
| +X | 13.58 | 90.00 | 90.00 |
| +Y | 91.83 | 15.41 | 90.00 |
| +Z | 76.54 | 74.59 | 0.00  |

S-MATRICES FOR INITIAL AND FINAL CELLS:

|          |          |          |         |          |          |
|----------|----------|----------|---------|----------|----------|
| 10.00751 | -0.27307 | 2.33485  | 9.99583 | -0.32913 | 2.39278  |
| 0.00000  | 11.72153 | 3.02070  | 0.00000 | 11.67531 | 3.21811  |
| 0.00000  | 0.00000  | 12.49030 | 0.00000 | 0.00000  | 12.73260 |

FINITE EULERIAN STRAIN TENSOR BASED ON XYZ

THERMAL EXPANSION TENSOR VALUES MULTIPLIED BY 10\*\*1

|           |           |          |           |           |          |
|-----------|-----------|----------|-----------|-----------|----------|
| -0.001150 | -0.002848 | 0.000828 | -0.000072 | -0.000178 | 0.000052 |
| -0.002848 | -0.003883 | 0.005942 | -0.000178 | -0.000243 | 0.000371 |
| 0.000828  | 0.005942  | 0.019211 | 0.000052  | 0.000371  | 0.001201 |

ESTIMATED STANDARD DEVIATIONS FROM UNIT CELL AND INTENSIVE VARIABLE ESDS

|          |          |          |          |          |          |
|----------|----------|----------|----------|----------|----------|
| 0.000207 | 0.000028 | 0.000044 | 0.000013 | 0.000004 | 0.000003 |
| 0.000028 | 0.000214 | 0.000046 | 0.000004 | 0.000014 | 0.000007 |
| 0.000044 | 0.000046 | 0.000210 | 0.000003 | 0.000007 | 0.000025 |

| PRINCIPAL STRAIN | ESD      | PROPERTY  | ESD      | ANGLES TO +X | +Y         | +Z          | +A          | +B         | +C          |
|------------------|----------|-----------|----------|--------------|------------|-------------|-------------|------------|-------------|
| -0.006860        | 0.000161 | -0.000043 | 0.000001 | 62.6( 1.0)   | 30.4( 0.8) | 102.2( 0.2) | 68.2( 1.0)  | 39.2( 0.6) | 102.2( 0.2) |
| 0.000387         | 0.000174 | 0.000002  | 0.000001 | 152.6( 0.9)  | 63.3( 0.9) | 95.9( 0.3)  | 154.3( 0.8) | 66.1( 0.7) | 95.9( 0.3)  |
| 0.020651         | 0.000187 | 0.000129  | 0.000003 | 89.6( 0.2)   | 76.4( 0.3) | 13.6( 0.3)  | 77.0( 0.1)  | 61.0( 0.3) | 13.6( 0.3)  |

## References:

1. D. A. Skoog, *Principles of instrumental analysis*, Third edition, Saunders college publishing, 1985, 1-879.
2. M. J. Cliffe, A. L. Goodwin, *J. Appl. Crystallogr.* 2012, **45**, 1321-1329.
3. (The win\_strain program is unpublished but available for download from [www.rossangel.com](http://www.rossangel.com)).

4. *SAINT Data Reduction Software*, Version 6.45; Bruker AXS Inc., Madison, WI, 2003.
5. (a) *SADABS*, Version 2.05; Bruker AXS Inc., Madison, WI, 2002; (b) R. H. Blessing, *Acta Crystallogr., Sect. A: Found. Crystallogr.* 1995, **51**, 33-38.
6. G. M. Sheldrick, *Acta Crystallogr., Sect. A: Found. Crystallogr.* 2008, **64**, 112-122.
7. L. J. Barbour, *J. Supramol. Chem.* 2001, **1**, 189-191.
